# Supplementary material for: Identification of key microorganisms in facultative stabilization ponds from dairy industries, using metagenomics
Source: PeerJ. 2022 Mar 14;10:e12772. doi: 10.7717/peerj.12772 (PMC8929167; doi:10.7717/peerj.12772)
Supplement: Supplemental Information 3 [file peerj-10-12772-s003.xls]

## Sheet: Sheet1
Table S3: Absolute number of reads observed for each major taxonomic lineage.
Taxa	AUR1	AUR2	CYC1	CYC2	CYC3	CYC4
d__Archaea	23075	25084	23268	51264	60139	51835
d__Archaea|p__Candidatus Geothermarchaeota	19	14	3	30	14	19
d__Archaea|p__Candidatus Korarchaeota	8	11	1	1	8	8
d__Archaea|p__Candidatus Lokiarchaeota	119	45	79	86	149	116
d__Archaea|p__Candidatus Micrarchaeota	7	9	9	11	9	11
d__Archaea|p__Crenarchaeota	852	705	761	899	1166	1061
d__Archaea|p__Euryarchaeota	21564	23989	22021	49728	57979	49879
d__Archaea|p__Thaumarchaeota	486	288	380	457	725	600
d__Bacteria	3079481	4244615	6525862	5218115	6394329	4973776
d__Bacteria|p__Acidobacteria	3870	3381	2640	3349	5360	5504
d__Bacteria|p__Actinobacteria	1032533	2689231	106765	128597	228678	255169
d__Bacteria|p__Aquificae	989	553	1193	1170	1512	1089
d__Bacteria|p__Armatimonadetes	479	474	182	241	495	439
d__Bacteria|p__Bacteroidetes	221430	92423	315383	338101	474912	306679
d__Bacteria|p__Balneolaeota	486	222	277	371	460	309
d__Bacteria|p__Caldiserica	140	67	98	144	167	140
d__Bacteria|p__Calditrichaeota	584	268	196	251	401	317
d__Bacteria|p__Candidatus Bipolaricaulota	117	90	87	133	249	189
d__Bacteria|p__Candidatus Cloacimonetes	368	251	437	978	1927	1270
d__Bacteria|p__Candidatus Omnitrophica	348	454	243	426	536	422
d__Bacteria|p__Candidatus Saccharibacteria	7840	2109	25314	12716	7919	2901
d__Bacteria|p__Chlamydiae	969	587	777	916	1211	947
d__Bacteria|p__Chlorobi	8312	6558	4948	5745	8198	5892
d__Bacteria|p__Chloroflexi	13020	12192	9972	9605	11195	8504
d__Bacteria|p__Chrysiogenetes	259	241	511	421	565	464
d__Bacteria|p__Coprothermobacterota	39	32	28	34	45	50
d__Bacteria|p__Cyanobacteria	24037	15014	16807	18277	31600	25462
d__Bacteria|p__Deferribacteres	602	336	743	825	1113	789
d__Bacteria|p__Deinococcus-Thermus	10499	11645	3824	4293	7193	7581
d__Bacteria|p__Dictyoglomi	195	127	197	238	345	262
d__Bacteria|p__Elusimicrobia	292	171	276	319	536	313
d__Bacteria|p__Fibrobacteres	265	157	138	178	301	279
d__Bacteria|p__Firmicutes	249407	118262	834048	561341	555665	344494
d__Bacteria|p__Fusobacteria	5397	2582	6342	7034	9539	6663
d__Bacteria|p__Gemmatimonadetes	1163	1418	481	612	1120	1027
d__Bacteria|p__Ignavibacteriae	423	231	492	574	695	530
d__Bacteria|p__Kiritimatiellaeota	4618	2952	394	820	1569	1255
d__Bacteria|p__Nitrospirae	1130	994	900	1087	1832	1752
d__Bacteria|p__Planctomycetes	11201	12391	5454	7912	13073	12483
d__Bacteria|p__Proteobacteria	1222242	1041684	4842210	3690007	4567827	3657961
d__Bacteria|p__Spirochaetes	51793	18479	201642	266114	228215	132908
d__Bacteria|p__Synergistetes	13396	6607	10825	13612	20083	16011
d__Bacteria|p__Tenericutes	12765	8235	11465	13692	18807	16364
d__Bacteria|p__Thermodesulfobacteria	596	421	1038	1048	1303	971
d__Bacteria|p__Thermotogae	5581	6862	2525	3270	4539	3236
d__Bacteria|p__Verrucomicrobia	7042	5837	3576	5418	8876	7262
d__Viruses	67146	33758	96343	60015	33735	16002
d__Viruses|k__Bamfordvirae	302	347	571	649	931	692
d__Viruses|k__Bamfordvirae|p__Nucleocytoviricota	273	277	560	641	899	666
d__Viruses|k__Bamfordvirae|p__Preplasmiviricota	29	70	11	8	32	26
d__Viruses|k__Orthornavirae	110	49	68	62	99	77
d__Viruses|k__Orthornavirae|p__Duplornaviricota	30	8	2	5	4	6
d__Viruses|k__Orthornavirae|p__Kitrinoviricota	39	16	13	11	24	16
d__Viruses|k__Orthornavirae|p__Negarnaviricota	18	10	4	14	18	15
d__Viruses|k__Orthornavirae|p__Pisuviricota	23	15	49	30	52	40
d__Viruses|k__Pararnavirae	4	1	3	3	3	5
d__Viruses|k__Pararnavirae|p__Artverviricota	4	1	3	3	3	5
d__Viruses|k__Shotokuvirae	13	3	5	4	9	18
d__Viruses|k__Shotokuvirae|p__Cossaviricota	12	1	4	4	8	14
d__Viruses|p__Peploviricota	31	42	45	47	41	49
d__Viruses|p__Uroviricota	66555	33215	95512	58938	31996	14609
Total	3169702	4303457	6645473	5329394	6488203	5041613
