# Supplementary material for: Identification of key microorganisms in facultative stabilization ponds from dairy industries, using metagenomics
Source: PeerJ. 2022 Mar 14;10:e12772. doi: 10.7717/peerj.12772 (PMC8929167; doi:10.7717/peerj.12772)
Supplement: Supplemental Information 5 [file peerj-10-12772-s005.xls]

## Sheet: Sheet1
Table S5: Average nucleotide identity between MAGs.
MAG1	MAG2	% ID	% Aligned
INTA.AUR.063	INTA.CYC.029	99.93	89.61
INTA.AUR.026	INTA.CYC.020	99.98	86.58
INTA.AUR.070	INTA.CYC.166	99.97	83.48
INTA.AUR.027	INTA.CYC.017	99.72	74.78
INTA.AUR.040	INTA.CYC.052	99.97	74.62
INTA.AUR.036	INTA.CYC.091	98.2	68.56
INTA.CYC.104	INTA.CYC.153	83.43	42.9
INTA.AUR.009	INTA.AUR.005	83.54	36.23
INTA.AUR.007	INTA.CYC.094	82.59	25.52
INTA.CYC.017	INTA.CYC.086	82.5	24.52
INTA.AUR.027	INTA.CYC.086	82.95	23.05
INTA.AUR.039	INTA.CYC.094	80.64	17.07
INTA.AUR.039	INTA.AUR.007	80.39	16.88
INTA.AUR.051	INTA.CYC.071	81.81	14.72
INTA.AUR.055	INTA.CYC.078	80.78	13.19
INTA.AUR.045	INTA.CYC.064	98.42	11.73
INTA.AUR.082	INTA.CYC.166	80.36	9.88
INTA.AUR.070	INTA.AUR.082	79.54	8.95
INTA.CYC.109	INTA.CYC.134	75.27	7.84
INTA.AUR.010	INTA.CYC.074	76.92	6.71
INTA.AUR.011	INTA.CYC.051	76.58	5.62
